# Supplementary material for: CoFe2O4@MnFe2O4/polypyrrole nanocomposites for in vitro photothermal/magnetothermal combined therapy
Source: Royal Society of Chemistry journal article supplement (doi:10.1039/c4ra12733a), 2014-12-19
Supplement: c4ra12733a1.pdf [file c4ra12733a1.pdf]

## Supporting Information

### **CoFe<sub>2</sub>O<sub>4</sub>@MnFe<sub>2</sub>O<sub>4</sub>/Polypyrrole Nanocomposites for *in vitro* Photothermal/Magnetothermal Combined Therapy**

Jun Wang<sup>1</sup>, Zhiguo Zhou<sup>a\*</sup>, Li Wang<sup>a</sup>, Jie Wei<sup>a</sup>, Hong Yang<sup>a</sup>, Shiping Yang<sup>a, b</sup>, Jiangmin Zhao<sup>b\*</sup>

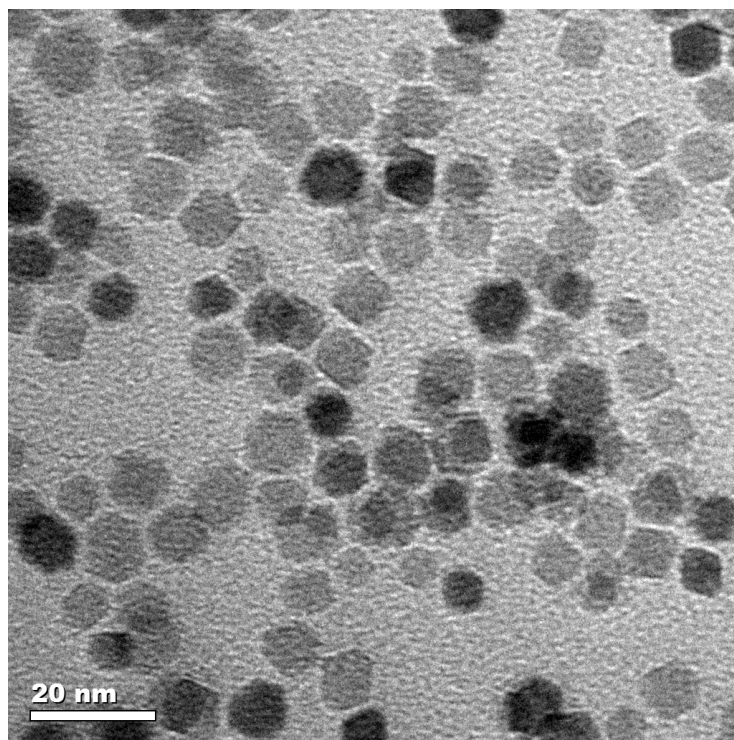

Figure S1 A typical TEM of CoFe<sub>2</sub>O<sub>4</sub> nanoparticles

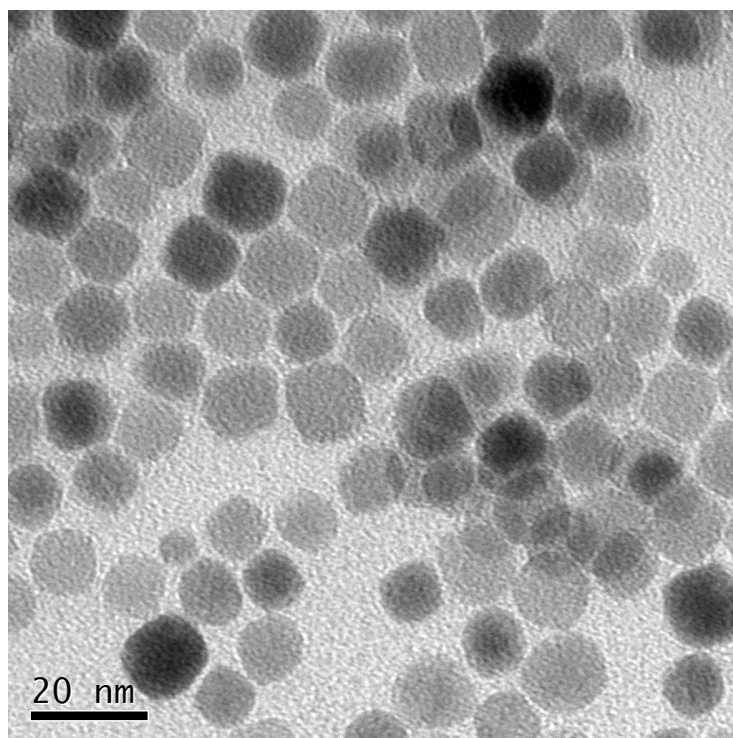

Figure S2 A typical TEM of  $\text{CoFe}_2\text{O}_4@\text{MnFe}_2\text{O}_4$  nanoparticles

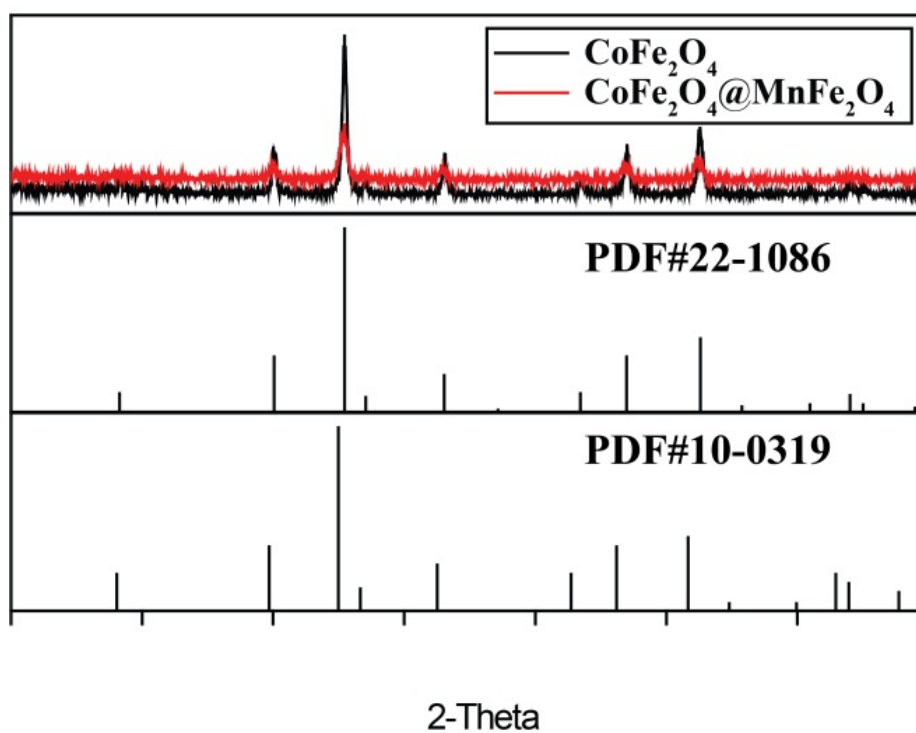

**Figure S3.** X-ray diffraction patterns of  $\text{CoFe}_2\text{O}_4$  nanoparticles (black) and  $\text{CoFe}_2\text{O}_4@\text{MnFe}_2\text{O}_4$  nanocomposites (red).

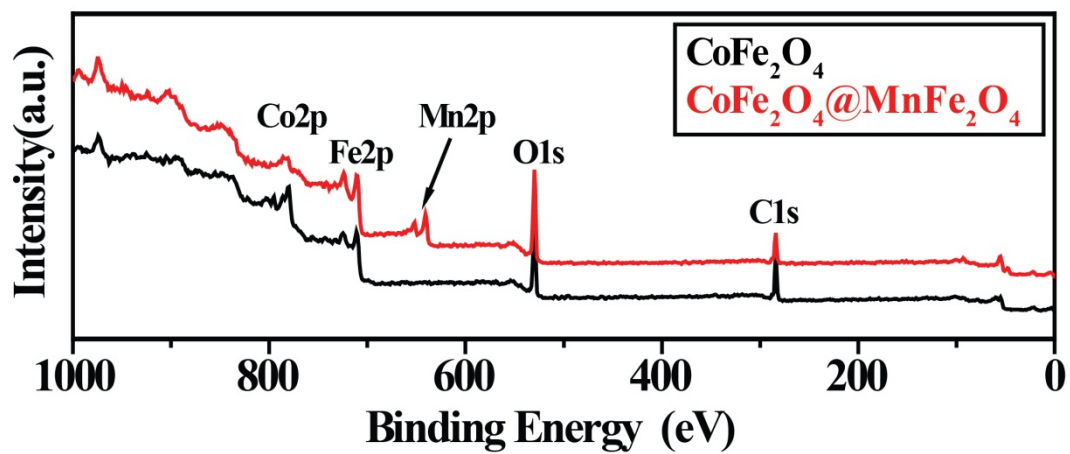

**Figure S4.** XPS spectra of CoFe<sub>2</sub>O<sub>4</sub> nanoparticles (black) and CoFe<sub>2</sub>O<sub>4</sub>@MnFe<sub>2</sub>O<sub>4</sub> nanocomposites (red)
